# Supplementary material for: Phenotypic and functional alterations of monocyte subsets with aging
Source: Springer Nature journal article supplement (doi:10.1186/s12979-022-00321-9), 2022-12-13
Supplement: MOESM1 [file 12979_2022_321_MOESM1_ESM.pdf]

**Figure S1. Gating strategy of monocyte subsets and the number of total monocyte and monocyte subsets among young, middle-aged, and older adults.**

- A. The fresh isolated PBMCs were gated for forward and side-scatter (FSC/SSC), doublets, live/dead and CD45<sup>+</sup>CD3<sup>-</sup>CD15<sup>-</sup>CD19<sup>-</sup> prior to identification of monocytes.
- B. Comparison of the number of total monocytes among whole blood in young, middle-aged, and older adults (young: 21-40 years, n = 42; middle-aged: 41-60 years, n = 34; older: >60 years, n = 34). *P*-values were calculated using the non-parametric Kruskal-Wallis rank test and followed by post hoc analysis.
- C. Comparison of the number of Mo0, Mo1, Mo2 and Mo3 subpopulations among all monocytes in young, middle-aged, and older adults were performed according to the expression pattern of CD14 and CD16 (young: 21-40 years, n = 42; middle-aged: 41-60 years, n = 34; older: >60 years, n = 34). *P*-values were calculated using the non-parametric Kruskal-Wallis rank test and followed by post hoc analysis.

**Figure S2. Representative flow cytometry data of cytokine-secreting capacity of total monocytes with mock controls or LPS stimulation.**

- A. The TNF- $\alpha$  and IL-6 producing capacity of total monocyte with mock controls and LPS stimulation (100ng/ml) for 3h *in vitro* from young adults.
- B. The TNF- $\alpha$ , IL-6, IL-10, GM-CSF and IL-1 $\beta$  producing capacity of total monocyte with mock controls from young, middle-aged and older adults (young:21-40 years,

n = 9; middle-aged:41-60 years, n = 9; older: >60 years, n = 15). *P*-values were obtained by a Kruskal-Wallis test and followed by post hoc analysis.

**Figure S3. The percentage and median fluorescent intensity (MFI) of total monocyte cytokines from young, middle-aged and older adults**

A. Intracellular staining for IL-10, GM-CSF and IL-1 $\beta$  in total monocytes from young, middle-aged and older adults (young:21-40 years, n = 42; middle-aged:41-60 years, n = 34; older: >60 years, n = 34) upon *in vitro* LPS stimulation. *P*-values were obtained by a Kruskal-Wallis test and followed by post hoc analysis.

B. The MFI of IL-10, GM-CSF, IL-1 $\beta$ , TNF- $\alpha$  and IL-6 on total monocyte from young, middle-aged and older adults (young:21-40 years, n = 42; middle-aged:41-60 years, n = 34; older: >60 years, n = 34) upon *in vitro* LPS stimulation. *P*-values were obtained by a Kruskal-Wallis test and followed by post hoc analysis.

**Figure S4. The MFI of HLA-DR, CD88, CD29, CD11b and CD62L on monocyte subsets.**

A. The histograms of CD11b, HLA-DR, CD62L, CD29, and CD88 on monocyte subsets from young adults.

B. The MFI of CD11b, HLA-DR, CD62L, CD29, and CD88 on monocyte subsets from young, middle-aged and older adults.

**Figure S5. The MFI of CD29 and CD88 on monocyte subsets from young, middle-**

**aged and older adults.**

- A. Line plot demonstrating the dynamic trend profiling of the MFI of HLA-DR, CD11b, CD62L, CD29, CD88 (loess smoothed normalized counts  $\pm$  standard error (SE)) from monocyte subsets in 21-40, 41-60, >60 three groups healthy individuals. (young: 21-40 years, n = 23; middle-aged: 41-60 years, n = 15; older: >60 years, n = 44)
- B. The boxplots show that the MFI of CD29 and CD88 on monocyte subsets from young, middle-aged and older adults. *P*-values were obtained by a Kruskal-Wallis test and followed by post hoc analysis.

**Figure S6. The MFI of CCR2 and CX3CR1 on monocyte subsets from young, middle-aged and elderly adults.**

- A. The histograms of CCR2 and CX3CR1 from monocyte subsets in 21-40, 41-60, >60 three groups.
- B. Line plot demonstrating the dynamic trend profiling of the MFI of CCR2 and CX3CR1 (loess smoothed normalized counts  $\pm$  standard error (SE)) from monocyte subsets in 21-40, 41-60, >60 three groups. (young: 21-40 years, n = 23; middle-aged: 41-60 years, n = 15; older: >60 years, n = 44)
